# Supplementary material for: Foliar Mn and Zn Treatments Improve Apple Tree Nutrition and Help to Maintain Favorable Soil pH
Source: MDPI journal article supplement (doi:10.3390/horticulturae9101144), 2023-10-18
Supplement: s1 [file s1]

### Plant protection

- 09-10 (Green leaf tips about 5 mm above bud scales – Mouse-ear stage: Green leaf tips 10 mm above the bud scales; first leaves separating) – copper hydroxide ( $576 \text{ g kg}^{-1}$ )  $2 \text{ kg ha}^{-1}$ ;
- 56 (Green bud stage: single flowers separating (still closed)) – Penthiopyrad ( $200 \text{ g L}^{-1}$ )  $0,7 \text{ L ha}^{-1}$ , Dimethoate ( $400 \text{ g L}^{-1}$ )  $1,5 \text{ L ha}^{-1}$ ;
- 61 (Beginning of flowering: about 10% of flowers open) – Tetraconazole ( $125 \text{ g L}^{-1}$ )  $0,4 \text{ L ha}^{-1}$ ;
- 69 (End of flowering: all petals fallen) – Pyrimethanil ( $375 \text{ g L}^{-1}$ ) + Fluopiram ( $125 \text{ g L}^{-1}$ )  $1 \text{ L ha}^{-1}$ , Chlorpyrifos ( $480 \text{ g L}^{-1}$ )  $2 \text{ L ha}^{-1}$ ;
- 72 (Fruit size up to 20 mm) – Tetraconazole ( $125 \text{ g L}^{-1}$ )  $0,4 \text{ L ha}^{-1}$ , Thiachloprid ( $480 \text{ g L}^{-1}$ )  $0,3 \text{ L ha}^{-1}$ ;
- 74 (Fruit diameter up to 40 mm) – Penthiopyrad ( $200 \text{ g L}^{-1}$ )  $0,75 \text{ L ha}^{-1}$ ; Dimethoate ( $400 \text{ g L}^{-1}$ )  $1,5 \text{ L ha}^{-1}$ ;
- 75 (Fruit above half final size) – Propineb ( $700 \text{ g kg}^{-1}$ )  $2,2 \text{ kg ha}^{-1}$ ;
- 76 (Fruit about 60% final size) – Tetraconazole ( $125 \text{ g L}^{-1}$ )  $0,4 \text{ L ha}^{-1}$ , Chlorpyrifos ( $480 \text{ g L}^{-1}$ )  $2 \text{ L ha}^{-1}$ ;
- 77 (Fruit about 70% final size) – Trifloxystrobin ( $500 \text{ g L}^{-1}$ )  $0,14 \text{ L ha}^{-1}$ ,  $\beta$ -cypermethrin ( $40 \text{ g L}^{-1}$ ) + Dimethoate ( $300 \text{ g L}^{-1}$ )  $0,5 \text{ L ha}^{-1}$ ;
- 78 (Fruit about 80% final size) – Tetraconazole ( $125 \text{ g L}^{-1}$ )  $0,4 \text{ L ha}^{-1}$ , Thiachloprid ( $480 \text{ g L}^{-1}$ );
- 79 (Fruit about 80% final size)  $\beta$ -cypermethrin ( $40 \text{ g L}^{-1}$ ) + Dimethoate ( $300 \text{ g L}^{-1}$ )  $0,5 \text{ L ha}^{-1}$ .
